# Supplementary material
Source: publisher site journal article supplement (https://www.spandidos-publications.com/1361/downloadSupplementary)
Supplement: Supplementary file 1 [file downloadSupplementary]

Figure S1. Survival curves of 5 surgery methods and number of patients at risk in different survival time in patients with tumor size <54 mm; tumor size ≥54 mm (P-values represented the significance of the difference among survival curves of the 5 surgery methods in two different tumor-size groups).

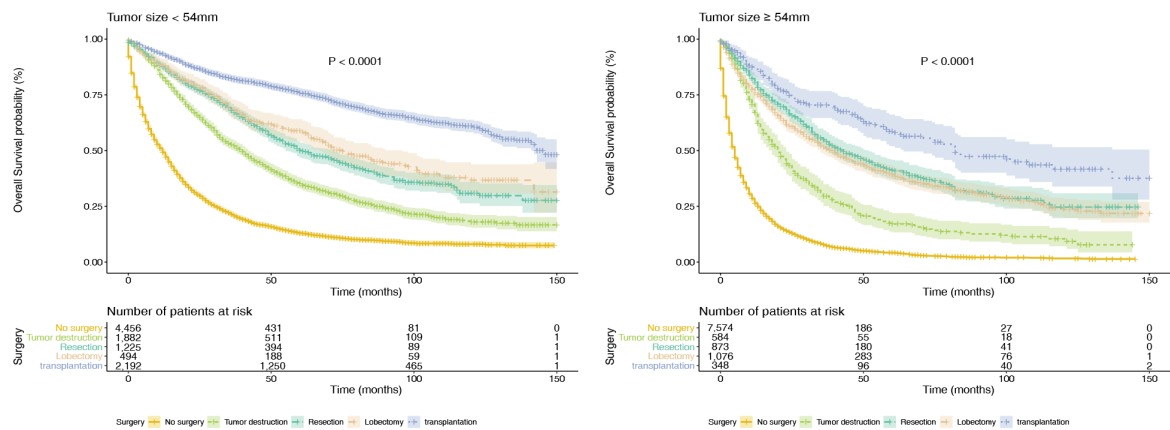

Figure S2. Survival curves of 5 surgery methods and number of patients at risk in different survival time in patients with age <62 years; age ≥62 years (P-values represented the significance of the difference among survival curves of the 5 surgery methods in two different age groups).

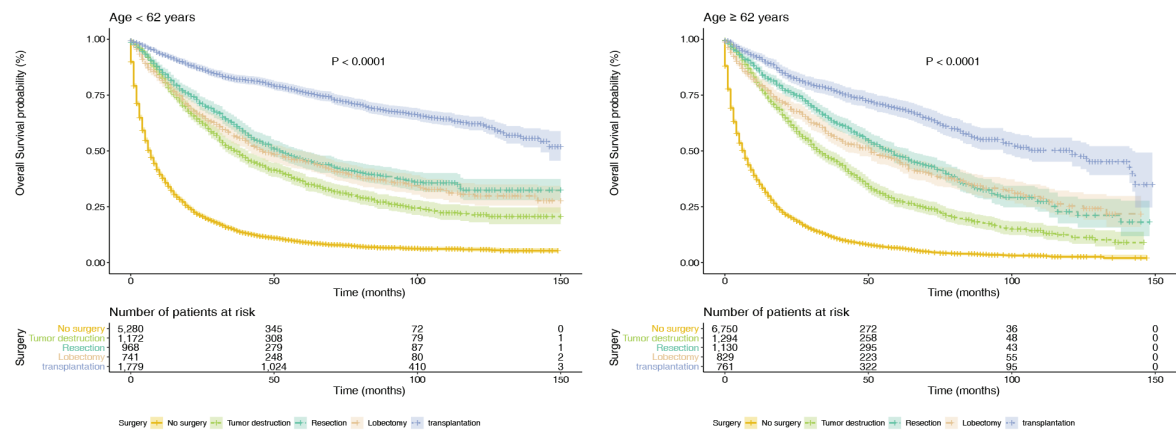

Figure S3. Survival curves of 5 surgery methods and number of patients at risk in different survival time in patients with localized metastasis; regional metastasis; distant metastasis (P-values represented the significance of the difference among survival curves of the 5 surgery methods in three different metastasis groups).

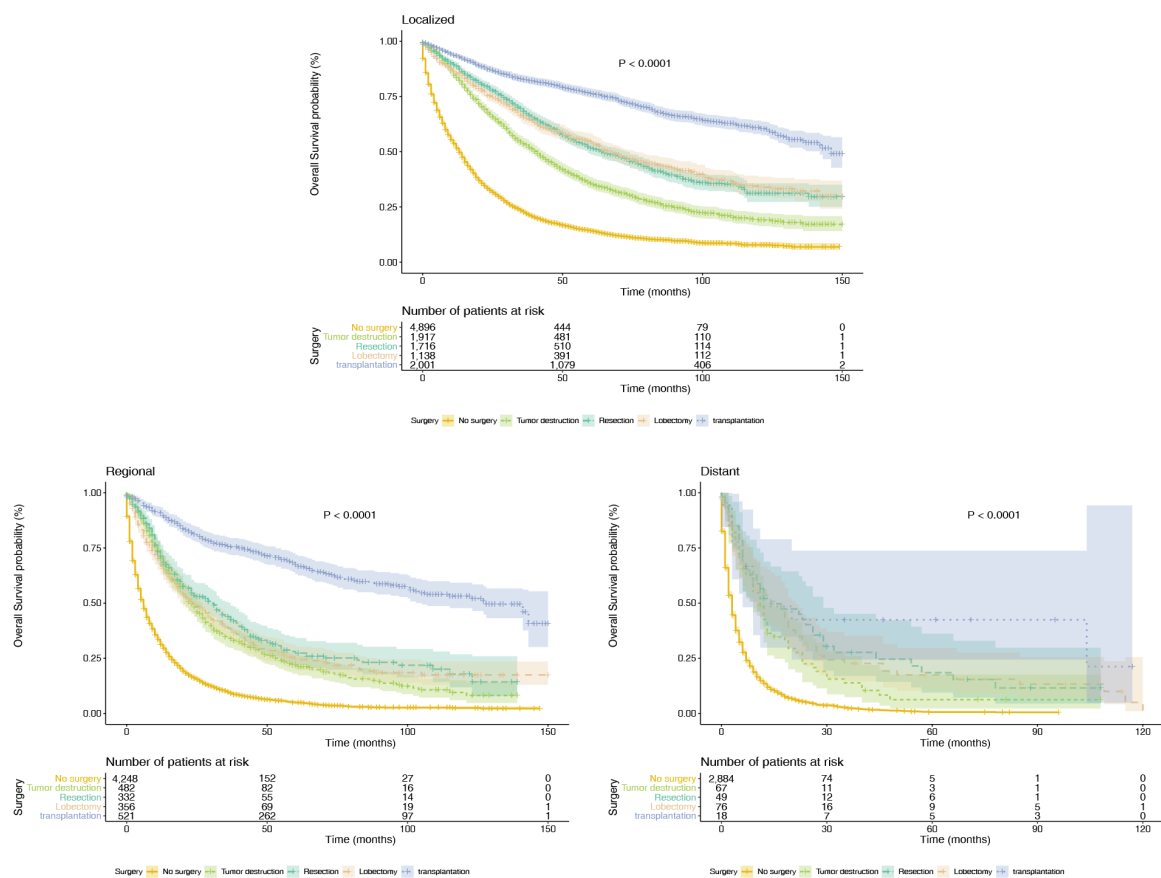

Figure S4. Survival curves of 5 surgery methods and number of patients at risk in different survival time in patients with well-differentiated tumors, moderately differentiated tumors, poorly differentiated tumors and undifferentiated tumors (P-values represented the significance of the difference among survival curves of the 5 surgery methods in four different differentiated groups).

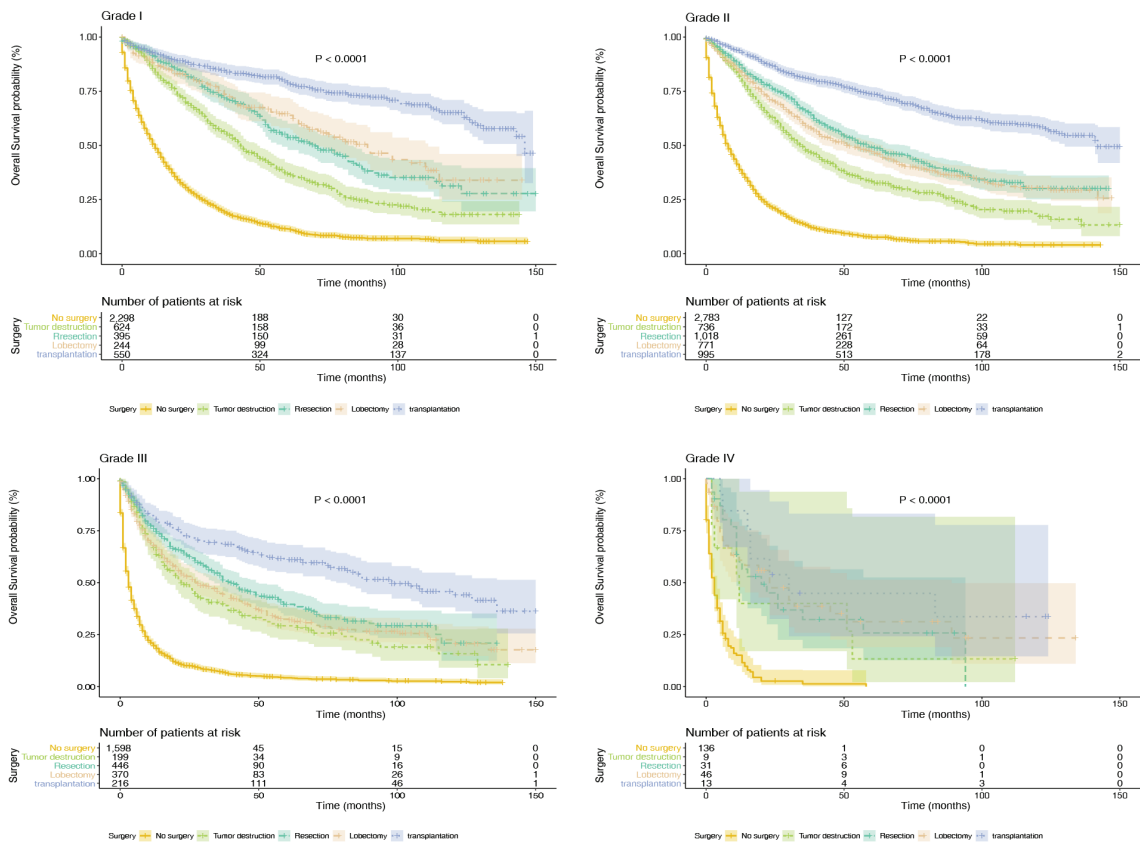

Table SI. Stratified analysis by tumor size.

|                    | No surgery | Local tumor<br>destruction | Wedge or<br>segmental resection | Lobectomy | Liver<br>transplantation |
|--------------------|------------|----------------------------|---------------------------------|-----------|--------------------------|
| Tumor size <54 mm  |            |                            |                                 |           |                          |
| HR                 | Reference  | 0.54                       | 0.36                            | 0.30      | 0.17                     |
| 95% CI             |            | 0.51-0.59                  | 0.33-0.40                       | 0.26-0.35 | 0.16-0.19                |
| P-value            |            | <0.001                     | <0.001                          | <0.001    | <0.001                   |
| Tumor size, ≥54 mm |            |                            |                                 |           |                          |
| HR                 | Reference  | 0.44                       | 0.26                            | 0.27      | 0.18                     |
| 95% CI             |            | 0.40-0.50                  | 0.24-0.29                       | 0.25-0.30 | 0.15-0.21                |
| P-value            |            | <0.001                     | <0.001                          | <0.001    | <0.001                   |

The 10 most important predictors were included in the stratified models. CI, confidence interval; HR, hazards ratio.

Table SII. Stratified analysis by age.

|                | No surgery | Local tumor<br>destruction | Wedge or<br>segmental resection | Lobectomy | Liver<br>transplantation |
|----------------|------------|----------------------------|---------------------------------|-----------|--------------------------|
| Age, <62 years |            |                            |                                 |           |                          |
| HR             | Reference  | 0.49                       | 0.34                            | 0.31      | 0.15                     |
| 95% CI         |            | 0.45-0.54                  | 0.31-0.38                       | 0.28-0.34 | 0.14-0.17                |
| P-value        |            | <0.001                     | <0.001                          | <0.001    | <0.001                   |
| Age, ≥62 years |            |                            |                                 |           |                          |
| HR             | Reference  | 0.47                       | 0.28                            | 0.27      | 0.18                     |
| 95% CI         |            | 0.43-0.50                  | 0.25-0.31                       | 0.25-0.31 | 0.16-0.20                |
| P-value        |            | <0.001                     | <0.001                          | <0.001    | <0.001                   |

The 10 most important predictors were included in the stratified models. CI, confidence interval; HR, hazards ratio.

Table SIII. Stratified analysis by historic stage.

|           | No surgery | Local tumor<br>destruction | Wedge or<br>segmental resection | Lobectomy | Liver<br>transplantation |
|-----------|------------|----------------------------|---------------------------------|-----------|--------------------------|
| Localized |            |                            |                                 |           |                          |
| HR        | Reference  | 0.49                       | 0.30                            | 0.26      | 0.16                     |
| 95% CI    |            | 0.45-0.52                  | 0.28-0.33                       | 0.24-0.29 | 0.15-0.18                |
| P-value   |            | <0.001                     | <0.001                          | <0.001    | <0.001                   |
| Regional  |            |                            |                                 |           |                          |
| HR        | Reference  | 0.48                       | 0.34                            | 0.32      | 0.16                     |
| 95% CI    |            | 0.43-0.54                  | 0.29-0.39                       | 0.28-0.37 | 0.13-0.18                |
| P-value   |            | <0.001                     | <0.001                          | <0.001    | <0.001                   |
| Distant   |            |                            |                                 |           |                          |
| HR        | Reference  | 0.49                       | 0.30                            | 0.35      | 0.24                     |
| 95% CI    |            | 0.38-0.64                  | 0.21-0.42                       | 0.27-0.45 | 0.13-0.44                |
| P-value   |            | <0.001                     | <0.001                          | <0.001    | <0.001                   |

The 10 most important predictors were included in the stratified models. CI, confidence interval; HR, hazards ratio.

Table SIV. Stratified analysis by grade.

|           | No surgery | Local tumor<br>destruction | Wedge or<br>segmental resection | Lobectomy | Liver<br>transplantation |
|-----------|------------|----------------------------|---------------------------------|-----------|--------------------------|
| Grade I   |            |                            |                                 |           |                          |
| HR        | Reference  | 0.49                       | 0.30                            | 0.26      | 0.16                     |
| 95% CI    |            | 0.43-0.55                  | 0.26-0.36                       | 0.21-0.32 | 0.13-0.19                |
| P-value   |            | <0.001                     | <0.001                          | <0.001    | <0.001                   |
| Grade II  |            |                            |                                 |           |                          |
| HR        | Reference  | 0.47                       | 0.29                            | 0.28      | 0.15                     |
| 95% CI    |            | 0.42-0.52                  | 0.26-0.33                       | 0.25-0.31 | 0.13-0.17                |
| P-value   |            | <0.001                     | <0.001                          | <0.001    | <0.001                   |
| Grade III |            |                            |                                 |           |                          |
| HR        | Reference  | 0.43                       | 0.31                            | 0.32      | 0.19                     |
| 95% CI    |            | 0.36-0.53                  | 0.26-0.36                       | 0.28-0.37 | 0.15-0.23                |
| P-value   |            | <0.001                     | <0.001                          | <0.001    | <0.001                   |
| Grade IV  |            |                            |                                 |           |                          |
| HR        | Reference  | 0.34                       | 0.29                            | 0.19      | 0.15                     |
| 95% CI    |            | 0.15-0.79                  | 0.17-0.49                       | 0.12-0.31 | 0.07-0.34                |
| P-value   |            | 0.012                      | <0.001                          | <0.001    | <0.001                   |

The 10 most important predictors were included in the stratified models. CI, confidence interval; HR, hazards ratio
